# Supplementary material
Source: HighWire-hosted journal article supplement (https://www.cmajopen.ca/highwire/filestream/84077/field_highwire_adjunct_files/3/2020-0095-4-at.pdf)
Supplement: 2020-0095-4-at.pdf [file 2020-0095-4-at.pdf]

Appendix 4 (as supplied by the authors)

**Age-period-cohort intrinsic estimator model coefficients for non incidentally-detected differentiated thyroid cancer rates, Females, 1998-2017**

For female non-incidentally-detected cases, the age-period-cohort intrinsic estimator provides empirical evidence that the birth cohort constraint imposed (1918-1927=1923-1932) is appropriate. Since the method improves statistical efficiency, standard errors are reduced thus providing statistical evidence of significant "individual" age and birth cohort effects. The pattern of these effects is consistent with the parameter estimates from the constrained APC, which had larger standard errors due to the constraint imposed. However, the intrinsic estimator uses effect coding rather than reference coding and thus the parameter estimates are not directly comparable although they have been adjusted to the reference values of the constrained age-period-cohort model.

| Intrinsic estimator     |               |              |                |              |                      |               | Relevative to Referent groups | Constrained APC | Constrained APC | % change in coefficient IE vs Constrained |
|-------------------------|---------------|--------------|----------------|--------------|----------------------|---------------|-------------------------------|-----------------|-----------------|-------------------------------------------|
| covariate               | exp(b)        | Std. Err.    | z              | P>z          | [95% Conf. Interval] | exp(b)        | exp(b)                        | Std. Err.       | %               |                                           |
| <b>Intercept</b>        | <b>16.450</b> | <b>0.271</b> | <b>169.910</b> | <b>0.000</b> | <b>15.927 16.990</b> | <b>16.450</b> | 17.357                        | 8.432           | -5.2%           |                                           |
| <b>Age group</b>        |               |              |                |              |                      |               |                               |                 |                 |                                           |
| 15-19                   | 0.328         | 0.021        | -17.420        | 0.000        | 0.289 0.372          | 0.198         | 0.230                         | 0.196           | -13.9%          |                                           |
| 20-24                   | 0.638         | 0.026        | -10.840        | 0.000        | 0.589 0.692          | 0.386         | 0.438                         | 0.320           | -12.0%          |                                           |
| 25-29                   | 1.019         | 0.033        | 0.590          | 0.553        | 0.957 1.086          | 0.616         | 0.684                         | 0.416           | -10.0%          |                                           |
| 30-34                   | 1.369         | 0.038        | 11.350         | 0.000        | 1.296 1.445          | 0.826         | 0.899                         | 0.438           | -8.1%           |                                           |
| 35-39                   | 1.569         | 0.040        | 17.580         | 0.000        | 1.492 1.650          | 0.948         | 1.010                         | 0.369           | -6.2%           |                                           |
| 40-44                   | 1.619         | 0.041        | 19.250         | 0.000        | 1.542 1.701          | 0.978         | 1.020                         | 0.249           | -4.1%           |                                           |
| 45-49                   | 1.664         | 0.042        | 20.080         | 0.000        | 1.583 1.749          | 1.005         | 1.026                         | 0.127           | -2.1%           |                                           |
| 50-54                   | 1.656         | 0.044        | 18.990         | 0.000        | 1.572 1.744          | 1.000         | Referent                      |                 |                 |                                           |
| 55-59                   | 1.474         | 0.043        | 13.400         | 0.000        | 1.393 1.560          | 0.890         | 0.872                         | 0.109           | 2.1%            |                                           |
| 60-64                   | 1.298         | 0.041        | 8.240          | 0.000        | 1.220 1.381          | 0.784         | 0.751                         | 0.184           | 4.3%            |                                           |
| 65-69                   | 1.092         | 0.038        | 2.520          | 0.012        | 1.020 1.169          | 0.659         | 0.619                         | 0.227           | 6.5%            |                                           |
| 70-74                   | 0.969         | 0.037        | -0.810         | 0.420        | 0.899 1.046          | 0.585         | 0.538                         | 0.264           | 8.8%            |                                           |
| 75-79                   | 0.663         | 0.032        | -8.650         | 0.000        | 0.604 0.728          | 0.400         | 0.360                         | 0.217           | 11.2%           |                                           |
| 80-84                   | 0.365         | 0.026        | -14.070        | 0.000        | 0.317 0.420          | 0.220         | 0.194                         | 0.140           | 13.5%           |                                           |
| <b>Diagnosis period</b> |               |              |                |              |                      |               |                               |                 |                 |                                           |
| 1998-2002               | 0.590         | 0.009        | -35.740        | 0.000        | 0.573 0.607          | 1.000         | Referent                      |                 |                 |                                           |
| 2003-2007               | 0.925         | 0.011        | -6.610         | 0.000        | 0.904 0.946          | 1.567         | 1.601                         | 0.196           | -2.1%           |                                           |
| 2008-2012               | 1.327         | 0.014        | 27.270         | 0.000        | 1.301 1.355          | 2.249         | 2.346                         | 0.569           | -4.1%           |                                           |
| 2013-2017               | 1.380         | 0.016        | 28.070         | 0.000        | 1.350 1.412          | 2.339         | 2.492                         | 0.907           | -6.1%           |                                           |
| <b>Birth cohort</b>     |               |              |                |              |                      |               |                               |                 |                 |                                           |
| 1913-1922               | 1.143         | 0.201        | 0.760          | 0.448        | 0.810 1.612          | 0.972         | 1.201                         | 1.464           | -19.0%          |                                           |
| 1918-1927†              | 0.915         | 0.089        | -0.920         | 0.357        | 0.756 1.106          | 0.778         | 0.941                         | 0.942           | -17.3%          |                                           |
| 1923-1932               | 0.934         | 0.061        | -1.040         | 0.301        | 0.821 1.063          | 0.795         | 0.941                         | 0.942           | -15.5%          |                                           |
| 1928-1937               | 1.007         | 0.052        | 0.140          | 0.890        | 0.911 1.113          | 0.857         | 0.994                         | 0.843           | -13.8%          |                                           |
| 1933-1942               | 1.125         | 0.051        | 2.600          | 0.009        | 1.030 1.230          | 0.958         | 1.087                         | 0.792           | -11.9%          |                                           |
| 1938-1947               | 1.122         | 0.047        | 2.770          | 0.006        | 1.034 1.218          | 0.955         | 1.061                         | 0.646           | -10.0%          |                                           |
| 1943-1952               | 1.147         | 0.044        | 3.590          | 0.000        | 1.064 1.237          | 0.976         | 1.062                         | 0.517           | -8.1%           |                                           |
| 1948-1957               | 1.144         | 0.041        | 3.800          | 0.000        | 1.067 1.226          | 0.974         | 1.037                         | 0.379           | -6.1%           |                                           |
| 1953-1962               | 1.144         | 0.037        | 4.140          | 0.000        | 1.074 1.220          | 0.974         | 1.016                         | 0.248           | -4.1%           |                                           |
| 1958-1967               | 1.180         | 0.035        | 5.530          | 0.000        | 1.113 1.252          | 1.005         | 1.026                         | 0.127           | -2.1%           |                                           |
| 1963-1972               | 1.175         | 0.034        | 5.650          | 0.000        | 1.111 1.243          | 1.000         | Referent                      |                 |                 |                                           |
| 1968-1977               | 1.140         | 0.032        | 4.710          | 0.000        | 1.080 1.204          | 0.970         | 0.950                         | 0.118           | 2.1%            |                                           |
| 1973-1982               | 1.031         | 0.029        | 1.090          | 0.275        | 0.976 1.090          | 0.878         | 0.841                         | 0.206           | 4.4%            |                                           |
| 1978-1987               | 0.921         | 0.028        | -2.720         | 0.007        | 0.868 0.977          | 0.784         | 0.736                         | 0.259           | 6.5%            |                                           |
| 1983-1992               | 0.736         | 0.029        | -7.880         | 0.000        | 0.682 0.794          | 0.626         | 0.576                         | 0.281           | 8.8%            |                                           |
| 1988-1997               | 0.719         | 0.039        | -6.010         | 0.000        | 0.646 0.801          | 0.612         | 0.551                         | 0.337           | 11.0%           |                                           |
| 1993-2002               | 0.675         | 0.074        | -3.580         | 0.000        | 0.544 0.837          | 0.574         | 0.506                         | 0.374           | 13.5%           |                                           |
| <b>Mean % change:</b>   |               |              |                |              |                      |               |                               |                 | <b>-2.7%</b>    |                                           |

Abbreviation: APC, age-period-cohort model; Conf. interval, confidence interval; exp(b), exponentiated coefficients (intercept per 100,000 rates; all others, rate ratios); Std. Err., standard error; P>z, probability that z<>0; z, z-score.
